# Supplementary material for: A review on the p-type transparent Cu–Cr–O delafossite materials
Source: Springer Nature journal article supplement (doi:10.1007/s10853-021-06815-z), 2022-01-17
Supplement: MOESM1 [file 20042746]

## **A review on the p-type transparent Cu-Cr-O delafossite materials**

Marco Moreira\*<sup>1,2</sup>, Joao Afonso\*<sup>1,2</sup>, Jonathan Crepelliere<sup>1</sup>, Damien Lenoble<sup>1</sup> and Petru Lunca-Popa<sup>1</sup>

<sup>1</sup> Material and Research Department (MRT), Luxembourg Institute of Science and Technology (LIST), 41 rue de Brill, L-4422, Belvaux, Luxembourg

<sup>2</sup> University of Luxembourg, 2 Avenue de l'Université, Esch-sur-Alzette L-4365, Luxembourg

## **Table SI**

Compilation of optoelectronic properties reported in literature for various  $ABO_2$  delafossite materials

The columns depicts (if reported within the article): First Author, Journal, Year, Synthesis Method; Material; Dopant; Dopant level; Electrical conductivity at room temperature; Direct or/and indirect band gap; carrier concentration; carrier mobility; Seebeck coefficient; Activation energy; thin film's thickness; Average optical transmission.

List of abbreviations for the deposition techniques:

**ALD** - Atomic Layer Deposition

**Comb.** – Combustion

### **Crystal Growth**

**CSD** - Chemical Solution Deposition

**CVD** - Chemical Vapour Deposition

**ER** - Exchange Reaction

**HT** – Hydrothermal

**MR** – Metathesis Reaction

**MS** - Magnetron Sputtering

**OPERE** - Oxygen Plasma Enhanced Reactive Evaporation

**PLD** - Pulsed Laser Deposition

**SG** - Sol-gel

**SS** – Solid State

**Th. Co.** - Thermal Co-evaporation

| First Author<br>Journal<br>Year<br>Synthesis Method | Material           | Dop. | Dop. level | $\sigma$ (S cm <sup>-1</sup> ) | E <sub>G D</sub> (eV) | E <sub>G I</sub> (eV) | n (cm <sup>-3</sup> ) | $\mu$ (cm <sup>2</sup> V <sup>-1</sup> s <sup>-1</sup> ) | S ( $\mu$ V/K) | E <sub>act</sub> (V) | t (nm) | T (%) |
|-----------------------------------------------------|--------------------|------|------------|--------------------------------|-----------------------|-----------------------|-----------------------|----------------------------------------------------------|----------------|----------------------|--------|-------|
| W. C. Sheets<br>Inorg. Chem.<br>2008<br>HT          | AgAlO <sub>2</sub> | -    | -          | 9.00E-3                        | 3.6                   | -                     | -                     | -                                                        | -              | -                    | -      | -     |
| D. B. Rogers<br>Inorg. Chem.<br>1971<br>SS          | AgCoO <sub>2</sub> | -    | -          | 6.67E-5                        | -                     | -                     | -                     | -                                                        | -              | 0.11                 | -      | -     |
| J. Tate<br>Thin Solid Films<br>2002<br>MS           | AgCoO <sub>2</sub> | -    | -          | 2.00E-1                        | 4.15                  | -                     | -                     | -                                                        | 220            | 0.07                 | 150    | 40-60 |
| S. Ajimsha<br>Thin Solid Films<br>2007<br>PLD       | AgCoO <sub>2</sub> | -    | -          | 8.77E-4                        | 3.89                  | -                     | -                     | -                                                        | 230            | -                    | 200    | 55    |
| D. Xiong<br>J. Alloys Compd.<br>2015<br>HT          | AgCrO <sub>2</sub> | -    | -          | 2.22E-6                        | 3.32                  | -                     | 4.33E11               | -                                                        | -              | -                    | -      | 60-75 |
| R. Nagarajan<br>Int. J. Inorg. Mater.<br>2001<br>SS | AgCrO <sub>2</sub> | -    | -          | 1.40E-6                        | -                     | -                     | -                     | -                                                        | -              | -                    | -      | -     |
|                                                     | AgCrO <sub>2</sub> | Mg   | 0.05       | 5.6E-5                         | -                     | -                     | -                     | -                                                        | -              | -                    | -      | -     |
| R. Wei<br>J. Mater. Chem. C<br>2017<br>SG           | AgCrO <sub>2</sub> | Mg   | 0.12       | 6.77E-2                        | -                     | -                     | -                     | 50                                                       | -              | 0.154                | 120    | 55    |
| D. B. Rogers<br>Inorg. Chem.<br>1971<br>SS          | AgFeO <sub>2</sub> | -    | -          | 3.33E-8                        | -                     | -                     | -                     | -                                                        | -              | 0.7                  | -      | -     |



| First Author<br>Journal<br>Year<br>Synthesis Method             | Material           | Dop. | Dop. level | $\sigma$ (S cm <sup>-1</sup> ) | E <sub>G D</sub> (eV) | E <sub>G I</sub> (eV) | n (cm <sup>-3</sup> ) | $\mu$ (cm <sup>2</sup> V <sup>-1</sup> s <sup>-1</sup> ) | S ( $\mu$ V/K) | E <sub>act</sub> (V) | t (nm) | T (%) |
|-----------------------------------------------------------------|--------------------|------|------------|--------------------------------|-----------------------|-----------------------|-----------------------|----------------------------------------------------------|----------------|----------------------|--------|-------|
| W. C. Sheets<br>Inorg. Chem.<br>2008<br>HT                      | AgScO <sub>2</sub> | -    | -          | 4.00E-2                        | 3.8                   | -                     | -                     | -                                                        | -              | -                    | -      | -     |
|                                                                 |                    | -    | -          | 9.00E-2                        | -                     | -                     | 2.8E17                | -                                                        | -              | 0.27                 | 500    | -     |
| A.N. Banerjee<br>Sol. Energy Mater.<br>Sol. Cells<br>2005<br>MS | CuAlO <sub>2</sub> | -    | -          | 1.60E-1                        | -                     | -                     | 4.5E17                | -                                                        | -              | 0.245                | 500    | -     |
|                                                                 |                    | -    | -          | 3.90E-1                        | -                     | -                     | 1.2E18                | -                                                        | -              | 0.196                | 500    | -     |
|                                                                 |                    | -    | -          | 1.40E-2                        | -                     | -                     | -                     | -                                                        | -              | 0.325                | 500    | -     |
| A. N. Banerjee<br>Thin Solid films<br>2003<br>MS                | CuAlO <sub>2</sub> | -    | -          | 8.00E-2                        | 3.66                  | 2.1                   | -                     | -                                                        | 128            | 0.26                 | 700    | -     |
| B. L. Stevens<br>J. Vac. Sci. Technol., A<br>2011<br>MS         | CuAlO <sub>2</sub> | -    | -          | 1.83E0                         | 3.9                   | -                     | 5E19                  | 0.03                                                     | -              | 0.27                 | 185    | 75    |
| B. J. Ingram<br>Chem. Mater.<br>2004<br>SS                      | CuAlO <sub>2</sub> | -    | -          | 3.00E-2                        | -                     | -                     | 1.20E21               | 8.9E-3                                                   | 670            | -                    | -      | -     |
| B. J. Ingram<br>Chem. Mater.<br>2004<br>HT                      | CuAlO <sub>2</sub> | -    | -          | 2.00E-1                        | -                     | -                     | 3.8E21                | -                                                        | -              | -                    | -      | -     |

| First Author<br>Journal<br>Year<br>Synthesis Method            | Material           | Dop. | Dop. level | $\sigma$ (S cm <sup>-1</sup> ) | E <sub>G D</sub> (eV) | E <sub>G I</sub> (eV) | n (cm <sup>-3</sup> ) | $\mu$ (cm <sup>2</sup> V <sup>-1</sup> s <sup>-1</sup> ) | S ( $\mu$ V/K) | E <sub>act</sub> (V) | t (nm)  | T (%) |
|----------------------------------------------------------------|--------------------|------|------------|--------------------------------|-----------------------|-----------------------|-----------------------|----------------------------------------------------------|----------------|----------------------|---------|-------|
| CT. Su<br>J. Cryst. Growth<br>2011<br>MS                       | CuAlO <sub>2</sub> | -    | -          | 1.01E0                         | 3.3                   | -                     | -                     | -                                                        | -              | 0.285                | 150     | 70    |
| F.A. Benko<br>J. Phys. Chem. Solids<br>1984<br>SS              | CuAlO <sub>2</sub> | -    | -          | 1.70E-3                        | -                     | 1.65                  | 1.1E19                | 1E-4                                                     | 670            | .                    | -       | -     |
| H. Gong<br>Appl. Phys. Lett.<br>2000<br>CVD                    | CuAlO <sub>2</sub> | -    | -          | 2.00E0                         | 3.75                  | -                     | 2.6E19                | 0.5                                                      | -              | 0.12                 | 250     | -     |
| H. Kawazoe<br>MRS Bull.<br>2000<br>PLD                         | CuAlO <sub>2</sub> | -    | -          | 9.50E-1                        | 3.5                   | -                     | 1.3E17                | 0.13                                                     | 183            | 0.2                  | 500     | 80    |
|                                                                | CuAlO <sub>2</sub> | -    | -          | 4.00E-2                        | 3.43                  | -                     | 4.99E16               | 5                                                        | -              | -                    | 450     | -     |
| K.R. Murali<br>Mater. Sci.<br>Semicond. Process.<br>2013<br>SG | CuAlO <sub>2</sub> | -    | -          | 5.00E-2                        | 3.6                   | -                     | 4.16E16               | 7.5                                                      | -              | -                    | 200-450 | -     |
|                                                                | CuAlO <sub>2</sub> | -    | -          | 1.00E-1                        | 3.68                  | -                     | 5.94E16               | 10.5                                                     | -              | -                    | 200-450 | -     |
|                                                                | CuAlO <sub>2</sub> | -    | -          | 5.00E-1                        | 3.75                  | -                     | 2.08E17               | 15                                                       | -              | -                    | 200     | 75    |
| M. Ohashi<br>J. Am. Ceram. Soc.<br>2001<br>SG                  | CuAlO <sub>2</sub> | -    | -          | 4.00E-3                        | -                     | -                     | -                     | -                                                        | -              | -                    | 1100    | -     |

| First Author<br>Journal<br>Year<br>Synthesis Method    | Material           | Dop. | Dop. level | $\sigma$ (S cm <sup>-1</sup> ) | E <sub>G D</sub> (eV) | E <sub>G I</sub> (eV) | n (cm <sup>-3</sup> ) | $\mu$ (cm <sup>2</sup> V <sup>-1</sup> s <sup>-1</sup> ) | S ( $\mu$ V/K) | E <sub>act</sub> (V) | t (nm) | T (%) |
|--------------------------------------------------------|--------------------|------|------------|--------------------------------|-----------------------|-----------------------|-----------------------|----------------------------------------------------------|----------------|----------------------|--------|-------|
| N. Daichakomphy<br>J. Phys. Chem. Solids<br>2019<br>SS | CuAlO <sub>2</sub> | Fe   | 0.1        | 5.37E-1                        | -                     | -                     | 8.09E17               | 4.149                                                    | -              | -                    | -      | -     |
|                                                        | CuAlO <sub>2</sub> | Fe   | 0.1        | 5.77E-1                        | -                     | -                     | 9.08E17               | 3.97                                                     | -              | -                    | -      | -     |
| RS. Yu<br>Thin Solid films<br>2012<br>MS               | CuAlO <sub>2</sub> | -    | -          | 4.12E-3                        | 3.26                  | -                     | -                     | -                                                        | -              | -                    | 460    | -     |
|                                                        | CuAlO <sub>2</sub> | -    | -          | 4.31E-3                        | 3.33                  | -                     | -                     | -                                                        | -              | -                    | 460    | -     |
| S. Götzendörfer<br>Thin Solid Films<br>2009<br>SG      | CuAlO <sub>2</sub> | -    | -          | 1.43E-3                        | -                     | -                     | -                     | -                                                        | 440            | -                    | 530    | 65    |
| S. Gao<br>Nanotechnology<br>2003<br>MR                 | CuAlO <sub>2</sub> | -    | -          | 2.4E0                          | 3.75                  | -                     | 5.4E18                | 3.6                                                      | -              | 0.14                 | 420    | 55    |
| Y. Wang<br>Chem. Vap. Deposition<br>2000<br>CVD        | CuAlO <sub>2</sub> | -    | -          | 7.31E0                         | 3.75                  | -                     | 4.51E19               | 2.1                                                      | -              | -                    | 120    | 45    |
|                                                        | CuAlO <sub>2</sub> | -    | -          | 1.60E+1                        | 3.6                   | -                     | 9.19E19               | 2.29                                                     | -              | -                    | 120    | 52    |
|                                                        | CuAlO <sub>2</sub> | -    | -          | 1.68E+1                        | 3.64                  | -                     | 1.64E20               | 1.56                                                     | -              | -                    | 120    | 52    |

| First Author<br>Journal<br>Year<br>Synthesis Method | Material           | Dop. | Dop. level | $\sigma$ (S cm <sup>-1</sup> ) | E <sub>G D</sub> (eV) | E <sub>G I</sub> (eV) | n (cm <sup>-3</sup> ) | $\mu$ (cm <sup>2</sup> V <sup>-1</sup> s <sup>-1</sup> ) | S ( $\mu$ V/K) | E <sub>act</sub> (V) | t (nm) | T (%) |
|-----------------------------------------------------|--------------------|------|------------|--------------------------------|-----------------------|-----------------------|-----------------------|----------------------------------------------------------|----------------|----------------------|--------|-------|
| Y. Wang<br>Chem. Vap. Deposition<br>2000<br>CVD     | CuAlO <sub>2</sub> | -    | -          | 1.71E+1                        | 3.67                  | -                     | 1.17E20               | 1.96                                                     | -              | -                    | 120    | 52    |
| C. Ruttanapun<br>J. Appl. Phys.<br>2013<br>SS       | CuBO <sub>2</sub>  | -    | -          | 4.12E-4                        | 3.6                   | -                     | -                     | -                                                        | -              | 0.58                 | -      | -     |
| K. L. Sanal<br>Mater. Sci. Eng., B<br>2014<br>MS    | CuBO <sub>2</sub>  | -    | -          | 1.10E-1                        | 3.2                   | -                     | -                     | -                                                        | -              | -                    | 150    | -     |
| Michael Snure<br>Appl. Phys. Lett<br>2007<br>PLD    | CuBO <sub>2</sub>  | -    | -          | 1.65E0                         | 4.5                   | 2.2                   | 1E17                  | 100                                                      | -              | -                    | 200    | 85    |
| D. B. Rogers<br>Inorg. Chem.<br>1971<br>SS          | CuCoO <sub>2</sub> | -    | -          | 5.00E-6                        | -                     | -                     | -                     | -                                                        | -              | 0.2                  | -      | -     |
| M. Beekman<br>J. Alloys Compd.<br>2009<br>MR        | CuCoO <sub>2</sub> | -    | -          | 2.00E-3                        | 0.4                   | -                     | -                     | -                                                        | -175           | 0.2                  | -      | -     |
| A. Barnabé,<br>J. Mater. Chem. C,<br>2015<br>MS     | CuCrO <sub>2</sub> | Mg   | 0.03       | 2.00E-3                        | -                     | -                     | 5.19E17               | 2.530                                                    | 804            | -                    | 100    | -     |
|                                                     | CuCrO <sub>2</sub> | Mg   | 0.03       | 1.78E+1                        | -                     | -                     | 1.09E21               | 0.074                                                    | 140            | -                    | 100    | 54.2  |
|                                                     | CuCrO <sub>2</sub> | Mg   | 0.03       | 3.46E+1                        | -                     | -                     | 8.07E20               | 0.408                                                    | 167            | -                    | 100    | -     |



| First Author<br>Journal<br>Year<br>Synthesis Method | Material           | Dop. | Dop. level | $\sigma$ (S cm <sup>-1</sup> ) | E <sub>G D</sub> (eV) | E <sub>G I</sub> (eV) | n (cm <sup>-3</sup> ) | $\mu$ (cm <sup>2</sup> V <sup>-1</sup> s <sup>-1</sup> ) | S ( $\mu$ V/K) | E <sub>act</sub> (V) | t (nm) | T (%) |
|-----------------------------------------------------|--------------------|------|------------|--------------------------------|-----------------------|-----------------------|-----------------------|----------------------------------------------------------|----------------|----------------------|--------|-------|
| A. Barnabé,<br>J. Mater. Chem. C,<br>2015<br>MS     | CuCrO <sub>2</sub> | Mg   | 0.03       | 3.78E+1                        | -                     | -                     | 1.32E21               | 0.192                                                    | 122            | -                    | 100    | 65.4  |
|                                                     | CuCrO <sub>2</sub> | Mg   | 0.03       | 5.22E+1                        | -                     | -                     | 1.18E21               | 0.163                                                    | 133            | -                    | 100    | 68.7  |
|                                                     | CuCrO <sub>2</sub> | Mg   | 0.03       | 5.25E+1                        | 3.3                   | -                     | 1.34E21               | 0.155                                                    | 121            | 0.055                | 100    | 63.3  |
|                                                     | CuCrO <sub>2</sub> | Mg   | 0.03       | 6.43E+1                        | -                     | -                     | 1.42E21               | 0.103                                                    | 116            | -                    | 100    | 60.1  |
| A. C. Rastogi,<br>J. Appl. Phys.<br>2008<br>Spray   | CuCrO <sub>2</sub> | Mg   | 0.03       | 2.00E-1                        | 3.14                  | 2.79                  | 2.1E19                | 0.014                                                    | -              | 0.22                 | 305    | 70    |
|                                                     | CuCrO <sub>2</sub> | Mg   | 0.07       | 1.00E0                         | 3.08                  | 2.58                  | 1.2E19                | 0.25                                                     | 70             | 0.22                 | 155    | 80    |
| CH. Sun<br>Ceram. Int.<br>2016<br>MS                | CuCrO <sub>2</sub> | -    | -          | 2.88E-2                        | 3.08                  | -                     | 4.7E17                | 0.39                                                     | -              | -                    | -      | 61.8  |
|                                                     | CuCrO <sub>2</sub> | -    | -          | 3.64E-2                        | -                     | -                     | 2.85E18               | 0.18                                                     | -              | -                    | 173    | -     |
|                                                     | CuCrO <sub>2</sub> | -    | -          | 6.79E-2                        | 3.13                  | -                     | 1.42E18               | 0.3                                                      | -              | -                    | -      | -     |



| First Author<br>Journal<br>Year<br>Synthesis<br>Method | Material           | Dop. | Dop. level | $\sigma$ (S cm <sup>-1</sup> ) | E <sub>G D</sub> (eV) | E <sub>G I</sub> (eV) | n (cm <sup>-3</sup> ) | $\mu$ (cm <sup>2</sup> V <sup>-1</sup> s <sup>-1</sup> ) | S ( $\mu$ V/K) | E <sub>act</sub> (V) | t (nm) | T (%) |
|--------------------------------------------------------|--------------------|------|------------|--------------------------------|-----------------------|-----------------------|-----------------------|----------------------------------------------------------|----------------|----------------------|--------|-------|
| Da Li<br>Vacuum<br>2010<br>PLD                         | CuCrO <sub>2</sub> | -    | -          | 1.10E-2                        | 3.2                   | -                     | -                     | -                                                        | -              | -                    | 134    | 60    |
|                                                        | CuCrO <sub>2</sub> | -    | -          | 1.50E-2                        | 3.2                   | -                     | -                     | -                                                        | -              | -                    | 57     | 55    |
|                                                        | CuCrO <sub>2</sub> | -    | -          | 3.30E-1                        | 3.2                   | -                     | -                     | -                                                        | -              | -                    | 127    | 60    |
| DC. Tsai<br>J. Mater. Res.<br>Technol.<br>2018<br>MS   | CuCrO <sub>2</sub> | -    | -          | 3.60E-2                        | -                     | -                     | 2.63E18               | 0.086                                                    | -              | -                    | 315    | 17.74 |
|                                                        | CuCrO <sub>2</sub> | -    | -          | 9.50E-2                        | -                     | -                     | 3.39E18               | 0.176                                                    | -              | -                    | 212.8  | 37.17 |
|                                                        | CuCrO <sub>2</sub> | -    | -          | 1.77E-1                        | -                     | -                     | 3.79E18               | 0.292                                                    | -              | -                    | 170.6  | 51.28 |
|                                                        | CuCrO <sub>2</sub> | -    | -          | 1.95E-1                        | 3.18                  | -                     | 4.02E18               | 0.303                                                    | -              | -                    | 166.9  | 58.31 |
| E. Norton<br>AIP Adv.<br>2018<br>Spray                 | CuCrO <sub>2</sub> | -    | -          | 2.00E+1                        | -                     | 2.4                   | 2.50E22               | 0.006                                                    | -              | 0.2                  | 90     | -     |
| F.A. Benko<br>Mater. Res. Bull.<br>1986<br>SS          | CuCrO <sub>2</sub> | Ca   | 0.05       | 1.00E-2                        | -                     | 1.28                  | -                     | -                                                        | 1210           | -                    | -      | -     |

| First Author<br>Journal<br>Year<br>Synthesis Method | Material           | Dop. | Dop. level | $\sigma$ (S cm <sup>-1</sup> ) | E <sub>G</sub> D (eV) | E <sub>G</sub> I (eV) | n (cm <sup>-3</sup> ) | $\mu$ (cm <sup>2</sup> V <sup>-1</sup> s <sup>-1</sup> ) | S ( $\mu$ V/K) | E <sub>act</sub> (V) | t (nm)  | T (%) |
|-----------------------------------------------------|--------------------|------|------------|--------------------------------|-----------------------|-----------------------|-----------------------|----------------------------------------------------------|----------------|----------------------|---------|-------|
| F. Lin<br>J. Alloys Compd.<br>2013<br>PLD           | CuCrO <sub>2</sub> | -    | -          | 1.78E0                         | 3.17                  | -                     | 1.40E18               | 7.7                                                      | -              | 0.11                 | 26      | 75    |
|                                                     | CuCrO <sub>2</sub> | Fe   | 0.05       | 2.53E0                         | 3.12                  | -                     | 2.52E18               | 6.27                                                     | -              | 0.067                | 36      | 72    |
|                                                     | CuCrO <sub>2</sub> | Fe   | 0.1        | 5.56E-3                        | 3.08                  | -                     | 6.51E18               | 5.32                                                     | -              | 0.064                | 38      | 68    |
|                                                     | CuCrO <sub>2</sub> | Fe   | 0.15       | 2.78E+1                        | 3.05                  | -                     | 4.09E19               | 4.2                                                      | -              | 0.04                 | 52      | 65    |
| G. Dong<br>Appl. Surf. Sci.<br>2012<br>MS           | CuCrO <sub>2</sub> | -    | -          | 8.00E-2                        | 3.05                  | -                     | 4.5E18                | 0.11                                                     | -              | 0.035                | 280-300 | 70    |
|                                                     | CuCrO <sub>2</sub> | -    | -          | 1.80E-1                        | 3.07                  | -                     | 8.7E18                | 0.14                                                     | -              | 0.035                | 280-300 | 70    |
|                                                     | CuCrO <sub>2</sub> | -    | -          | 1.10E0                         | 3.13                  | -                     | 3E19                  | 0.25                                                     | -              | 0.035                | 280-300 | 70    |
|                                                     | CuCrO <sub>2</sub> | -    | -          | 1.70E+1                        | 3.19                  | -                     | 1.4E20                | 0.81                                                     | -              | 0.035                | 280-300 | 70    |
| HY. Chen<br>Appl. Surf. Sci<br>2013<br>SG           | CuCrO <sub>2</sub> | -    | -          | 1.10E-3                        | 2.95                  | -                     | 2.8E14                | 25                                                       | -              | 0.285                | 190     | 45-55 |

| First Author<br>Journal<br>Year<br>Synthesis Method            | Material           | Dop. | Dop. level | $\sigma$ (S cm <sup>-1</sup> ) | E <sub>G D</sub> (eV) | E <sub>G I</sub> (eV) | n (cm <sup>-3</sup> ) | $\mu$ (cm <sup>2</sup> V <sup>-1</sup> s <sup>-1</sup> ) | S ( $\mu$ V/K) | E <sub>act</sub> (V) | t (nm)  | T (%) |
|----------------------------------------------------------------|--------------------|------|------------|--------------------------------|-----------------------|-----------------------|-----------------------|----------------------------------------------------------|----------------|----------------------|---------|-------|
| HY. Chen<br>Appl. Surf. Sci<br>2013<br>SG                      | CuCrO <sub>2</sub> | -    | -          | 3.20E-3                        | 2.9                   | -                     | 3.8E15                | 5.3                                                      | -              | -                    | 190     | 45-55 |
|                                                                | CuCrO <sub>2</sub> | -    | -          | 4.40E-3                        | 3.03                  | -                     | 5.9E15                | 4.7                                                      | -              | 0.275                | 190     | 60    |
|                                                                | CuCrO <sub>2</sub> | -    | -          | 1.60E-1                        | 3.06                  | -                     | 1.8E16                | 56                                                       | -              | 0.18                 | 210     | 60    |
| HY. Chen,<br>ECS J. Solid State Sci.<br>Technol.<br>2013<br>SG | CuCrO <sub>2</sub> | -    | -          | 2.00E-2                        | 3                     | -                     | 1.3E17                | 0.96                                                     | -              | -                    | 150-180 | 55-65 |
|                                                                | CuCrO <sub>2</sub> | -    | -          | 2.30E-2                        | 3.05                  | -                     | 1.9E17                | 0.76                                                     | -              | -                    | 180     | 60    |
|                                                                | CuCrO <sub>2</sub> | -    | -          | 3.80E-2                        | -                     | -                     | 1.7E17                | 1.4                                                      | -              | -                    | -       | -     |
| HY. Chen<br>Surf. Coat.<br>Technol<br>2013<br>SG               | CuCrO <sub>2</sub> | -    | -          | 1.50E-1                        | 3                     | -                     | 1.7E18                | 0.56                                                     | 20             | -                    | 190     | 50-55 |
|                                                                | CuCrO <sub>2</sub> | Zn   | 0.01       | 2.60E-1                        | 3.05                  | -                     | 2.15E18               | 0.76                                                     | 40             | -                    | 220     | 50    |
|                                                                | CuCrO <sub>2</sub> | Zn   | 0.03       | 4.70E-1                        | 3.05                  | -                     | 3.2E18                | 0.92                                                     | 113            | -                    | 205     | 50    |

| First Author<br>Journal<br>Year<br>Synthesis Method         | Material           | Dop. | Dop. level | $\sigma$ (S cm <sup>-1</sup> ) | E <sub>G D</sub> (eV) | E <sub>G I</sub> (eV) | n (cm <sup>-3</sup> ) | $\mu$ (cm <sup>2</sup> V <sup>-1</sup> s <sup>-1</sup> ) | S ( $\mu$ V/K) | E <sub>act</sub> (V) | t (nm) | T (%) |
|-------------------------------------------------------------|--------------------|------|------------|--------------------------------|-----------------------|-----------------------|-----------------------|----------------------------------------------------------|----------------|----------------------|--------|-------|
| HY. Chen<br>Appl. Surf. Sci.<br>2012<br>SG                  | CuCrO <sub>2</sub> | -    | -          | 2.70E-2                        | 3.08                  | -                     | 2.8E13                | 3.2                                                      | 230            | -                    | 125    | 66    |
| Hui Sun<br>J. Phys. D :<br>Appl. Phys.<br>2016<br>MS        | CuCrO <sub>2</sub> | Mg   | 0.07       | 2.74E-1                        | 3.12                  | -                     | -                     | -                                                        | -              | -                    | 370    | 54    |
| I. Sinnarasa<br>Nanomaterials<br>2017<br>MS                 | CuCrO <sub>2</sub> | Mg   | 0.03       | 5.10E-1                        | -                     | 2.73                  | 1.17E22               | -                                                        | 329            | 0.175                | -      | -     |
|                                                             | CuCrO <sub>2</sub> | -    | -          | 8.47E-5                        | 3                     | -                     | -                     | -                                                        | -              | -                    | -      | 83    |
|                                                             | CuCrO <sub>2</sub> | Fe   | 0.05       | 9.09E-5                        | 2.87                  | -                     | -                     | -                                                        | -              | -                    | -      | -     |
|                                                             | CuCrO <sub>2</sub> | Fe   | 0.01       | 1.00E-4                        | 3.05                  | -                     | -                     | -                                                        | -              | -                    | -      | -     |
| I. Kaya<br>J. Mater. Sci.:<br>Mater Electron.<br>2015<br>HT | CuCrO <sub>2</sub> | Fe   | 0.03       | 1.56E-4                        | 3.09                  | -                     | -                     | -                                                        | -              | 0.0925               | -      | 89    |
|                                                             | CuCrO <sub>2</sub> | Mg   | 0.01       | 1.06E-3                        | 3.01                  | -                     | -                     | -                                                        | -              | -                    | -      | -     |
|                                                             | CuCrO <sub>2</sub> | Mg   | 0.05       | 4.55E-3                        | 3.07                  | -                     | -                     | -                                                        | -              | -                    | -      | -     |

| First Author<br>Journal<br>Year<br>Synthesis Method             | Material           | Dop.   | Dop. level      | $\sigma$ (S cm <sup>-1</sup> ) | E <sub>G D</sub> (eV) | E <sub>G I</sub> (eV) | n (cm <sup>-3</sup> ) | $\mu$ (cm <sup>2</sup> V <sup>-1</sup> s <sup>-1</sup> ) | S ( $\mu$ V/K) | E <sub>act</sub> (V) | t (nm) | T (%) |
|-----------------------------------------------------------------|--------------------|--------|-----------------|--------------------------------|-----------------------|-----------------------|-----------------------|----------------------------------------------------------|----------------|----------------------|--------|-------|
| I. Kaya<br>J. Mater. Sci.:<br>Mater Electron.<br>2015<br>HT     | CuCrO <sub>2</sub> | Mg     | 0.03            | 1.47E-2                        | 3.06                  | -                     | -                     | -                                                        | -              | 0.0454               | -      | 91    |
| J. Cr pelli re<br>J. Mater. Chem. C<br>2016<br>CVD              | CuCrO <sub>2</sub> | -      | -               | 1.70E+1                        | 3.1                   | -                     | 9E21                  | 0.01                                                     | 110            | 0.063                | 150    | 50    |
|                                                                 | CuCrO <sub>2</sub> | -      | -               | 2.90E-3                        | 3.4                   | -                     | -                     | -                                                        | -              | -                    | -      | -     |
| J.H.L. Monteiro<br>Ceram. Int.<br>2018<br>Comb.                 | CuCrO <sub>2</sub> | Mg     | 0.005           | 9.00E-1                        | 3.3                   | -                     | -                     | -                                                        | -              | -                    | -      | -     |
|                                                                 | CuCrO <sub>2</sub> | Ag; Mg | 0.007;<br>0.005 | 1.60E0                         | 3.4                   | -                     | -                     | -                                                        | -              | -                    | -      | -     |
| J. Afonso<br>J. Mater. Sci.:<br>Mater. Electron.<br>2018<br>CVD | CuCrO <sub>2</sub> | -      | -               | 2.00E+1                        | 3.2                   | -                     | 2E21                  | -                                                        | -              | -                    | 250    | -     |
| L. Farrel<br>J. Mater. Chem. C<br>2016<br>Spray                 | CuCrO <sub>2</sub> | -      | -               | 1.20E+1                        | -                     | -                     | 1.20E22               | 0.006                                                    | 76             | 0.065                | 90     | 55    |
| M. Ahmadi<br>Appl. Phys. A<br>2018<br>MS                        | CuCrO <sub>2</sub> | -      | -               | 5.50E-4                        | 3.08                  | -                     | 5.23E16               | 0.063                                                    | -              | -                    | 95     | 82    |
|                                                                 | CuCrO <sub>2</sub> | -      | -               | 1.43E-3                        | 3.01                  | -                     | 8.98E17               | 0.673                                                    | -              | -                    | 150    | 53    |

| First Author<br>Journal<br>Year<br>Synthesis Method | Material           | Dop. | Dop. level | $\sigma$ (S cm <sup>-1</sup> ) | E <sub>G D</sub> (eV) | E <sub>G I</sub> (eV) | n (cm <sup>-3</sup> ) | $\mu$ (cm <sup>2</sup> V <sup>-1</sup> s <sup>-1</sup> ) | S ( $\mu$ V/K) | E <sub>act</sub> (V) | t (nm) | T (%) |
|-----------------------------------------------------|--------------------|------|------------|--------------------------------|-----------------------|-----------------------|-----------------------|----------------------------------------------------------|----------------|----------------------|--------|-------|
| M. Ahmadi<br>Appl. Phys. A<br>2018<br>MS            | CuCrO <sub>2</sub> | -    | -          | 4.75E-3                        | 2.94                  | -                     | 3.42E18               | 0.866                                                    | -              | -                    | 130    | 62    |
|                                                     | CuCrO <sub>2</sub> | -    | -          | 1.89E-2                        | 3                     | -                     | 1.47E19               | 0.8                                                      | -              | -                    | 120    | 73    |
| M. Ahmadi<br>Appl. Phys. Lett.<br>2018<br>MS        | CuCrO <sub>2</sub> | -    | -          | 1.00E-2                        | 3.38                  | -                     | 3.4E17                | 2.2                                                      | -              | -                    | 150    | 66    |
|                                                     | CuCrO <sub>2</sub> | -    | -          | 1.30E0                         | 3.42                  | -                     | 5.4E19                | 0.173                                                    | -              | -                    | 150    | 69    |
|                                                     | CuCrO <sub>2</sub> | Mg   | 0.05       | 5.20E0                         | 3.2                   | -                     | 1.3E20                | 0.011                                                    | -              | -                    | 150    | 64    |
|                                                     | CuCrO <sub>2</sub> | Mg   | 0.025      | 1.04E+1                        | 3.25                  | -                     | 3.1E20                | 0.18                                                     | -              | -                    | 150    | 66    |
|                                                     | CuCrO <sub>2</sub> | Mg   | 0.05       | 1.04E+2                        | 3.6                   | -                     | 9.1E20                | 0.023                                                    | -              | -                    | 150    | 67    |
| M. J. Han<br>J. Appl. Phys.<br>2013<br>SG           | CuCrO <sub>2</sub> | Mg   | 0.025      | 2.78E+2                        | 3.52                  | -                     | 1.18E21               | 0.006                                                    | -              | -                    | 150    | 69    |
|                                                     | CuCrO <sub>2</sub> | -    | -          | 8.80E-4                        | 3.14                  | 2.79                  | 1.42E15               | 3.89                                                     | -              | 0.292                | -      | 70-75 |



| First Author<br>Journal<br>Year<br>Synthesis Method | Material           | Dop. | Dop. level | $\sigma$ (S cm <sup>-1</sup> ) | E <sub>G</sub> D (eV) | E <sub>G</sub> I (eV) | n (cm <sup>-3</sup> ) | $\mu$ (cm <sup>2</sup> V <sup>-1</sup> s <sup>-1</sup> ) | S ( $\mu$ V/K) | E <sub>act</sub> (V) | t (nm) | T (%) |
|-----------------------------------------------------|--------------------|------|------------|--------------------------------|-----------------------|-----------------------|-----------------------|----------------------------------------------------------|----------------|----------------------|--------|-------|
| M. J. Han<br>J. Appl. Phys.<br>2013<br>SG           | CuCrO <sub>2</sub> | Mg   | 0.02       | 2.37E-                         | 3.11                  | 2.77                  | 1.36E17               | 1.09                                                     | -              | 0.187                | -      | 70-75 |
|                                                     | CuCrO <sub>2</sub> | Mg   | 0.04       | 8.32E-1                        | 3.1                   | 2.75                  | 2.11E19               | 0.25                                                     | -              | 0.087                | 320    | 70-75 |
|                                                     | CuCrO <sub>2</sub> | Mg   | 0.06       | 2.03E0                         | 3                     | 2.56                  | 3.29E19               | 0.39                                                     | -              | 0.07                 | -      | 70-75 |
|                                                     | CuCrO <sub>2</sub> | Mg   | 0.08       | 2.21E0                         | 3.02                  | 2.58                  | 4.07E20               | 0.03                                                     | -              | 0.055                | -      | 70-75 |
|                                                     | CuCrO <sub>2</sub> | Mg   | 0.1        | 2.94E0                         | 3.04                  | 2.64                  | 8.73E20               | 0.02                                                     | -              | 0.047                | -      | 70-75 |
|                                                     | CuCrO <sub>2</sub> | Mg   | 0.12       | 3.85E0                         | 3.06                  | 2.66                  | 8.66E20               | 0.03                                                     | -              | 0.042                | -      | 70-75 |
| M. O'Sullivan<br>J. Phys. Conf. Ser.<br>2010<br>PLD | CuCrO <sub>2</sub> | Mg   | 0.1        | 6.67E+1                        | -                     | -                     | 1E22                  | 0.042                                                    | -              | 0.003                | 135    | -     |
| M. Han<br>J. Alloys Compd.<br>2015<br>SG            | CuCrO <sub>2</sub> | -    | -          | 4.90E-3                        | 3.1                   | -                     | 2.15E15               | 14.1                                                     | -              | 0.003                | 239    | -     |
|                                                     | CuCrO <sub>2</sub> | -    | -          | 1.10E-3                        | 3.08                  | -                     | 1.34E15               | 5.28                                                     | -              | 0.219                | 240    | -     |

| First Author<br>Journal<br>Year<br>Synthesis Method | Material           | Dop. | Dop. level | $\sigma$ (S cm <sup>-1</sup> ) | E <sub>G D</sub> (eV) | E <sub>G I</sub> (eV) | n (cm <sup>-3</sup> ) | $\mu$ (cm <sup>2</sup> V <sup>-1</sup> s <sup>-1</sup> ) | S ( $\mu$ V/K) | E <sub>act</sub> (V) | t (nm) | T (%) |
|-----------------------------------------------------|--------------------|------|------------|--------------------------------|-----------------------|-----------------------|-----------------------|----------------------------------------------------------|----------------|----------------------|--------|-------|
| M. Han<br>J. Alloys Compd.<br>2015<br>SG            | CuCrO <sub>2</sub> | -    | -          | 4.00E-4                        | 3.06                  | -                     | 1.22E15               | 2.43                                                     | -              | 0.283                | 242    | -     |
| P. L. Popa<br>Appl. Mater. Today<br>2017<br>CVD     | CuCrO <sub>2</sub> | -    | -          | 7.00E-4                        | 3.17                  | -                     | -                     | -                                                        | 410            | 0.19                 | 150    | 55    |
|                                                     | CuCrO <sub>2</sub> | -    | -          | 1.02E+2                        | 3.2                   | -                     | 1.5E21                | 0.33                                                     | 87             | 0.06                 | 150    | 45    |
| P. L. Popa<br>Thin Solid Films<br>2016<br>CVD       | CuCrO <sub>2</sub> | -    | -          | 5.00E-3                        | 2.91                  | -                     | 3E18                  | -                                                        | 647            | 0.283                | 120    | -     |
|                                                     | CuCrO <sub>2</sub> | -    | -          | 4.00E-2                        | 3.07                  | -                     | 3.2E20                | -                                                        | 249            | 0.158                | 200    | -     |
|                                                     | CuCrO <sub>2</sub> | -    | -          | 4.50E-2                        | 3.05                  | -                     | 7.6E20                | -                                                        | 172            | 0.095                | 50     | -     |
|                                                     | CuCrO <sub>2</sub> | -    | -          | 5.00E-2                        | 3.16                  | -                     | 4.8E20                | -                                                        | 213            | -                    | 120    | -     |
| P. L. Popa<br>Thin Solid Films<br>2016<br>CVD       | CuCrO <sub>2</sub> | -    | -          | 3.00E-1                        | 3.18                  | -                     | 5.6E20                | -                                                        | 200            | 0.1                  | 70     | -     |
|                                                     | CuCrO <sub>2</sub> | -    | -          | 4.90E-1                        | 3.21                  | -                     | 9.2E20                | -                                                        | 155            | 0.09                 | 70     | -     |



| First Author<br>Journal<br>Year<br>Synthesis Method   | Material           | Dop. | Dop. level | $\sigma$ (S cm <sup>-1</sup> ) | E <sub>G D</sub> (eV) | E <sub>G I</sub> (eV) | n (cm <sup>-3</sup> ) | $\mu$ (cm <sup>2</sup> V <sup>-1</sup> s <sup>-1</sup> ) | S ( $\mu$ V/K) | E <sub>act</sub> (V) | t (nm) | T (%) |
|-------------------------------------------------------|--------------------|------|------------|--------------------------------|-----------------------|-----------------------|-----------------------|----------------------------------------------------------|----------------|----------------------|--------|-------|
| P. L. Popa<br>Sci. Rep.<br>2018<br>CVD                | CuCrO <sub>2</sub> | -    | -          | 1.20E+1                        | -                     | -                     | -                     | 0.004                                                    | 100            | -                    | -      | -     |
|                                                       | CuCrO <sub>2</sub> | -    | -          | 1.70E+1                        | -                     | -                     | 1.5E21                | 0.07                                                     | 110            | -                    | -      | -     |
|                                                       | CuCrO <sub>2</sub> | -    | -          | 1.90E+1                        | -                     | -                     | 9.4E16                | 0.086                                                    | 947            | -                    | -      | -     |
|                                                       | CuCrO <sub>2</sub> | -    | -          | 2.10E+1                        | -                     | -                     | 7.3E19                | 0.0001                                                   | 374            | -                    | -      | -     |
|                                                       | CuCrO <sub>2</sub> | -    | -          | 2.30E+1                        | -                     | -                     | 9.3E17                | 0.007                                                    | 753            | -                    | -      | -     |
|                                                       | CuCrO <sub>2</sub> | -    | -          | 3.10E+1                        | -                     | -                     | 2.9E20                | 0.002                                                    | 257            | -                    | -      | -     |
| P. Mandal<br>Curr. Appl Phys.<br>2021<br>SS           | CuCrO <sub>2</sub> | Li   | 0.015      | 5.00E-2                        | -                     | -                     | 4.77E14               | 65.51                                                    | -              | 0.2194               | -      | -     |
|                                                       | CuCrO <sub>2</sub> | Li   | 0.0124     | 2.00E-2                        | 3.51                  | -                     | 5.32E15               | 23.5                                                     | -              | 0.2266               | -      | -     |
| P. Mandal<br>J. Phys. D:<br>Appl. Phys.<br>2016<br>SG | CuCrO <sub>2</sub> | Mg   | 0.05       | 2.20E-2                        | 3.45                  | -                     | 2.23E15               | 61.7                                                     | -              | 0.0547               | -      | -     |

| First Author<br>Journal<br>Year<br>Synthesis Method                  | Material           | Dop. | Dop. level | $\sigma$ (S cm <sup>-1</sup> ) | E <sub>G D</sub> (eV) | E <sub>G I</sub> (eV) | n (cm <sup>-3</sup> ) | $\mu$ (cm <sup>2</sup> V <sup>-1</sup> s <sup>-1</sup> ) | S ( $\mu$ V/K) | E <sub>act</sub> (V) | t (nm)  | T (%) |
|----------------------------------------------------------------------|--------------------|------|------------|--------------------------------|-----------------------|-----------------------|-----------------------|----------------------------------------------------------|----------------|----------------------|---------|-------|
| P. Mandal<br>J. Phys. D:<br>Appl. Phys.<br>2016<br>SG                | CuCrO <sub>2</sub> | Mg   | 0.05       | 4.50E-2                        | 3.48                  | -                     | 1.73E16               | 16.26                                                    | -              | 0.068                | -       | -     |
| R. Nagarajan<br>J. Appl. Phys.<br>2001<br>MS                         | CuCrO <sub>2</sub> | -    | -          | 1.00E0                         | 3.1                   | -                     | -                     | -                                                        | -              | -                    | 250     | 30    |
|                                                                      | CuCrO <sub>2</sub> | Mg   | 0.05       | 2.20E+2                        | 3.1                   | 2.75                  | -                     | -                                                        | 153            | 0.02                 | 250     | 30    |
| R. Nagarajan<br>Int. J. Inorg. Mater.<br>2001<br>SS                  | CuCrO <sub>2</sub> | Mg   | 0.05       | 7.70E-2                        | -                     | -                     | -                     | -                                                        | -              | -                    | -       | -     |
|                                                                      | CuCrO <sub>2</sub> | -    | -          | 3.50E-5                        | -                     | -                     | -                     | -                                                        | -              | -                    | -       | -     |
| R.I. Sánchez-Alarcón<br>J. Phys. D :<br>Appl. Phys.<br>2016<br>Spray | CuCrO <sub>2</sub> | -    | -          | 3.50E+1                        | 3.17                  | -                     | 1E21                  | -                                                        | 119            | 0.09                 | 100-200 | 51    |
| RS. Yu<br>Coatings<br>2016<br>SG                                     | CuCrO <sub>2</sub> | -    | -          | 3.00E-2                        | 3.09                  | -                     | 1.1E15                | -                                                        | -              | -                    | 165     | 40    |
|                                                                      | CuCrO <sub>2</sub> | Zn   | 0.18       | 5.00E-2                        | 3.09                  | -                     | 8.8E15                | -                                                        | -              | -                    | 165     | 50    |
|                                                                      | CuCrO <sub>2</sub> | Zn   | 0.26       | 2.60E-1                        | 3.1                   | -                     | 1.8E17                | -                                                        | -              | -                    | 165     | 50    |

| First Author<br>Journal<br>Year<br>Synthesis Method       | Material           | Dop. | Dop. level | $\sigma$ (S cm <sup>-1</sup> ) | E <sub>G</sub> D (eV) | E <sub>G</sub> I (eV) | n (cm <sup>-3</sup> ) | $\mu$ (cm <sup>2</sup> V <sup>-1</sup> s <sup>-1</sup> ) | S ( $\mu$ V/K) | E <sub>act</sub> (V) | t (nm)  | T (%) |
|-----------------------------------------------------------|--------------------|------|------------|--------------------------------|-----------------------|-----------------------|-----------------------|----------------------------------------------------------|----------------|----------------------|---------|-------|
| RS. Yu<br>Coatings<br>2016<br>SG                          | CuCrO <sub>2</sub> | Zn   | 0.44       | 2.50E-1                        | 3.11                  | -                     | 1.7E17                | -                                                        | -              | -                    | 165     | 50    |
| RS. Yu<br>Appl. Surf. Sci.<br>2016<br>MS                  | CuCrO <sub>2</sub> | -    | -          | 1.22E-1                        | 3.12                  | -                     | 6.05E17               | 1.22                                                     | -              | -                    | -       | 67    |
|                                                           | CuCrO <sub>2</sub> | -    | -          | 2.32E-1                        | 3.14                  | -                     | 4.17E18               | 0.33                                                     | -              | -                    | -       | 62    |
| S. Götzendörfer<br>Thin Solid Films<br>2009<br>SG         | CuCrO <sub>2</sub> | -    | -          | 1.67E-2                        | -                     | -                     | -                     | -                                                        | -              | 202                  | 280     | 32    |
| S. Mahapatra<br>Chem. Vap. Deposition<br>2003<br>CVD      | CuCrO <sub>2</sub> | -    | -          | 8.60E-1                        | 3.08                  | 2.63                  | 4.75E17               | 11.16                                                    | -              | 0.108                | 390     | 40-50 |
| T. S. Tripathi<br>Physics Procedia<br>2015<br>ALD         | CuCrO <sub>2</sub> | -    | -          | 1.00E0                         | 3.09                  | -                     | -                     | -                                                        | 300-325        | -                    | 125     | 74-79 |
| T. S. Tripathi<br>Adv. Electron.<br>Mater.<br>2017<br>ALD | CuCrO <sub>2</sub> | Mg   | 0.025      | 2.17E+2                        | 3                     | -                     | 2.17E20               | -                                                        | 120            | 0.186                | 120-150 | 70    |
| TW. Chiu<br>Ceram. Int.<br>2012<br>CSD                    | CuCrO <sub>2</sub> | Mg   | 0.05       | 1.40E-1                        | 3.08                  | -                     | 1E18                  | 0.7                                                      | -              | -                    | 195     | 70    |
|                                                           | CuCrO <sub>2</sub> | Mg   | 0.05       | 2.80E-1                        | 3.1                   | -                     | 8E18                  | 0.2                                                      | -              | -                    | 197     | 50    |

| First Author<br>Journal<br>Year<br>Synthesis Method    | Material           | Dop. | Dop. level | $\sigma$ (S cm <sup>-1</sup> ) | E <sub>G D</sub> (eV) | E <sub>G I</sub> (eV) | n (cm <sup>-3</sup> ) | $\mu$ (cm <sup>2</sup> V <sup>-1</sup> s <sup>-1</sup> ) | S ( $\mu$ V/K) | E <sub>act</sub> (V) | t (nm) | T (%) |
|--------------------------------------------------------|--------------------|------|------------|--------------------------------|-----------------------|-----------------------|-----------------------|----------------------------------------------------------|----------------|----------------------|--------|-------|
| TW. Chiu<br>Ceram. Int.<br>2012<br>CSD                 | CuCrO <sub>2</sub> | Mg   | 0.05       | 3.13E0                         | 3.1                   | -                     | 5E19                  | 0.7                                                      | -              | -                    | 195    | 70    |
|                                                        | CuCrO <sub>2</sub> | -    | -          | 8.30E0                         | -                     | -                     | -                     | -                                                        | -              | -                    | 50     | 65    |
| U. Sidik<br>J. Nanosci.<br>Nanotechnol.<br>2015<br>PLD | CuCrO <sub>2</sub> | Mg   | 0.02       | 1.64E+1                        | -                     | -                     | -                     | -                                                        | -              | -                    | 50     | -     |
|                                                        | CuCrO <sub>2</sub> | Mg   | 0.02       | 2.96E+1                        | 3.22                  | -                     | -                     | -                                                        | -              | -                    | 50     | 60    |
| X. Zhou<br>J. Alloys.<br>Compd.<br>2014<br>PLD         | CuCrO <sub>2</sub> | -    | -          | 4.80E0                         | 3.13                  | -                     | 3.13E19               | 0.97                                                     | -              | 0.169                | 130    | 67    |
|                                                        | CuCrO <sub>2</sub> | Mn   | 0.05       | 1.70E-2                        | 3.06                  | -                     | 1.63E17               | 0.64                                                     | -              | 0.191                | 130    | 66    |
|                                                        | CuCrO <sub>2</sub> | Mn   | 0.1        | 8.00E-3                        | 3.04                  | -                     | 6.59E16               | 0.76                                                     | -              | 0.256                | 130    | 64    |
|                                                        | CuCrO <sub>2</sub> | Mn   | 0.15       | 8.00E-2                        | 3.16                  | -                     | 1.26E17               | 4.12                                                     | -              | 0.195                | 130    | 70    |
| Y. Wang<br>J. Sol-Gel<br>Sci. Technol.<br>2011<br>SG   | CuCrO <sub>2</sub> | -    | -          | 1.35E-2                        | 3.25                  | -                     | 1E17                  | -                                                        | -              | -                    | 89     | 60    |

| First Author<br>Journal<br>Year<br>Synthesis Method        | Material           | Dop. | Dop. level | $\sigma$ (S cm <sup>-1</sup> ) | E <sub>G D</sub> (eV) | E <sub>G I</sub> (eV) | n (cm <sup>-3</sup> ) | $\mu$ (cm <sup>2</sup> V <sup>-1</sup> s <sup>-1</sup> ) | S ( $\mu$ V/K) | E <sub>act</sub> (V) | t (nm) | T (%) |
|------------------------------------------------------------|--------------------|------|------------|--------------------------------|-----------------------|-----------------------|-----------------------|----------------------------------------------------------|----------------|----------------------|--------|-------|
| Y. Wang<br>J. Sol-Gel<br>Sci. Technol.<br>2011<br>SG       | CuCrO <sub>2</sub> | Mn   | 0.05       | 9.43E-6                        | 3.22                  | -                     | 1E17                  | -                                                        | -              | -                    | 89     | 60    |
|                                                            | CuCrO <sub>2</sub> | Mn   | 0.1        | 8.62E-6                        | 3.18                  | -                     | 1E17                  | -                                                        | -              | -                    | 89     | 60    |
| Y. Wang<br>J. Alloys. Compd.<br>2011<br>SG                 | CuCrO <sub>2</sub> | -    | -          | 1.84E-2                        | 3.15                  | 2.8                   | 3.14E15               | 6.75                                                     | 266            | -                    | 103    | 75    |
|                                                            | CuCrO <sub>2</sub> | Mg   | 0.03       | 2.75E-2                        | 3.12                  | 2.77                  | 2.53E16               | 3.47                                                     | 202            | -                    | 107    | 68    |
|                                                            | CuCrO <sub>2</sub> | Mg   | 0.05       | 1.36E-1                        | 3.11                  | 2.76                  | 3.14E18               | 2.13                                                     | 180            | -                    | 113    | 66    |
|                                                            | CuCrO <sub>2</sub> | Mg   | 0.07       | 1.97E-2                        | 3.1                   | 2.75                  | 6.23E15               | 6.12                                                     | 248            | -                    | 105    | 65    |
| K. Isawa<br>Phys. Rev. B:<br>Condens. Matter<br>1997<br>SS | CuEuO <sub>2</sub> | -    | -          | 3.01E-1                        | -                     | -                     | -                     | -                                                        | -              | -                    | -      | -     |
| A. Barnabé,<br>Mater Lett,<br>2006<br>MS                   | CuFeO <sub>2</sub> | -    | -          | 1.03E-3                        | 2                     | -                     | -                     | -                                                        | -              | -                    | 30     | 70    |
| A. Wuttig,<br>J. Mater. Chem. A,<br>2016<br>SS             | CuFeO <sub>2</sub> | -    | -          | 1.00E-1                        | -                     | -                     | 8E15                  | 90                                                       | -              | 0.053                | -      | -     |



| First Author<br>Journal<br>Year<br>Synthesis Method | Material           | Dop.    | Dop. level | $\sigma$ (S cm <sup>-1</sup> ) | E <sub>G</sub> D (eV) | E <sub>G</sub> I (eV) | n (cm <sup>-3</sup> ) | $\mu$ (cm <sup>2</sup> V <sup>-1</sup> s <sup>-1</sup> ) | S ( $\mu$ V/K) | E <sub>act</sub> (V) | t (nm) | T (%) |
|-----------------------------------------------------|--------------------|---------|------------|--------------------------------|-----------------------|-----------------------|-----------------------|----------------------------------------------------------|----------------|----------------------|--------|-------|
| A. Wuttig,<br>J. Mater. Chem. A,<br>2016<br>SS      | CuFeO <sub>2</sub> | Mg (Cu) | 0.005      | 2.00E-1                        | -                     | -                     | 2.2E16                | 50                                                       | -              | -                    | -      | -     |
|                                                     | CuFeO <sub>2</sub> | Mg (Cu) | 0.02       | 2.00E-1                        | -                     | -                     | 2E18                  | 60                                                       | -              | -                    | -      | -     |
|                                                     | CuFeO <sub>2</sub> | Mg      | 0.0005     | 1.00E0                         | -                     | -                     | 8E18                  | 1                                                        | -              | 0.034                | -      | -     |
|                                                     | CuFeO <sub>2</sub> | Mg      | 0.005      | 2.00E0                         | -                     | -                     | 1E18                  | 10                                                       | -              | -                    | -      | -     |
|                                                     | CuFeO <sub>2</sub> | Mg      | 0.02       | 6.00E0                         | -                     | -                     | 1E17                  | 400                                                      | -              | 0.021                | -      | -     |
| C. Rudradawong<br>Physica B<br>2017<br>SS           | CuFeO <sub>2</sub> | -       | -          | 3.60E0                         | 3.6                   | 2.6                   | -                     | -                                                        | -              | 0.049                | -      | -     |
| C. Ruttanapun<br>J. Alloys Compd.<br>2011<br>SS     | CuFeO <sub>2</sub> | -       | -          | 3.50E0                         | -                     | -                     | 1.56E18               | 8.6                                                      | 261            | 0.049                | -      | -     |
|                                                     | CuFeO <sub>2</sub> | Pt (Cu) | 0.01       | 5.00E0                         | -                     | -                     | 3.86E18               | 6                                                        | 249            | 0.046                | -      | -     |
|                                                     | CuFeO <sub>2</sub> | Pt (Cu) | 0.03       | 8.00E0                         | -                     | -                     | 8.08E18               | 4.5                                                      | 242            | 0.033                | -      | -     |

| First Author<br>Journal<br>Year<br>Synthesis Method  | Material           | Dop.    | Dop. level | $\sigma$ (S cm <sup>-1</sup> ) | E <sub>G D</sub> (eV) | E <sub>G I</sub> (eV) | n (cm <sup>-3</sup> ) | $\mu$ (cm <sup>2</sup> V <sup>-1</sup> s <sup>-1</sup> ) | S ( $\mu$ V/K) | E <sub>act</sub> (V) | t (nm) | T (%) |
|------------------------------------------------------|--------------------|---------|------------|--------------------------------|-----------------------|-----------------------|-----------------------|----------------------------------------------------------|----------------|----------------------|--------|-------|
| C. Ruttanapun<br>J. Alloys Compd.<br>2011<br>SS      | CuFeO <sub>2</sub> | Pt (Cu) | 0.05       | 1.10E1                         | -                     | -                     | 4.04E19               | 1.8                                                      | 240            | 0.028                | -      | -     |
| D. B. Rogers<br>Inorg. Chem.<br>1971<br>SS           | CuFeO <sub>2</sub> | -       | -          | 2.00E0                         | -                     | -                     | -                     | -                                                        | -              | 0.05                 | -      | -     |
|                                                      | CuFeO <sub>2</sub> | -       | -          | 1.53E0                         | -                     | -                     | -                     | 0.27                                                     | 544            | -                    | -      | -     |
|                                                      | CuFeO <sub>2</sub> | Sn      | 0.01       | 3.19E-3                        | -                     | -                     | -                     | 1.1E-6                                                   | -415           | -                    | -      | -     |
| F.A. Benko<br>J. Phys. Chem.<br>Solids<br>1987<br>SS | CuFeO <sub>2</sub> | Sn      | 0.05       | 2.4E-4                         | -                     | -                     | -                     | 2.7E-6                                                   | -318           | -                    | -      | -     |
|                                                      | CuFeO <sub>2</sub> | Mg      | 0.02       | 9.01E0                         | -                     | -                     | -                     | 0.17                                                     | 359            | -                    | -      | -     |
|                                                      | CuFeO <sub>2</sub> | Mg      | 0.05       | 8.93E0                         | -                     | -                     | -                     | 0.12                                                     | 330            | -                    | -      | -     |
|                                                      | CuFeO <sub>2</sub> | Mg      | 0.08       | 6.13E0                         | -                     | -                     | -                     | 0.06                                                     | 304            | -                    | -      | -     |
| HY. Chen<br>Thin Solid Films<br>2012<br>SG           | CuFeO <sub>2</sub> | -       | -          | 2.80E-1                        | 3.05                  | -                     | 1.2E18                | 1.42                                                     | 330            | 0.14                 | 90     | 50    |

| <b>First Author</b> | <b>Journal</b>        | <b>Year</b> | <b>Synthesis Method</b> | <b>Material</b>                                     | <b>Dop.</b> | <b>Dop. level</b> | <b><math>\sigma</math> (S cm<sup>-1</sup>)</b> | <b>E<sub>G D</sub> (eV)</b> | <b>E<sub>G I</sub> (eV)</b> | <b>n (cm<sup>-3</sup>)</b> | <b><math>\mu</math> (cm<sup>2</sup>V<sup>-1</sup>s<sup>-1</sup>)</b> | <b>S (<math>\mu</math>V/K)</b> | <b>E<sub>act</sub> (V)</b> | <b>t (nm)</b> | <b>T (%)</b> |    |
|---------------------|-----------------------|-------------|-------------------------|-----------------------------------------------------|-------------|-------------------|------------------------------------------------|-----------------------------|-----------------------------|----------------------------|----------------------------------------------------------------------|--------------------------------|----------------------------|---------------|--------------|----|
| HY. Chen            | Thin Solid Films      | 2012        | SG                      | CuFeO <sub>2</sub>                                  | -           | -                 | 3.60E-1                                        | 3.05                        | -                           | 5.3E18                     | 0.7                                                                  | 315                            | 0.11                       | 90            | 50           |    |
| R. Nagarajan        | Int. J. Inorg. Mater. | 2001        | SS                      | CuFe <sub>0.5</sub> V <sub>0.5</sub> O <sub>2</sub> | -           | -                 | 4.8E-6                                         | -                           | -                           | -                          | -                                                                    | -                              | -                          | -             | -            |    |
| F.A. Benko          | Phys. Status Solidi A | 1986        | SS                      | CuGaO <sub>2</sub>                                  | Ca          | 0.05              | 5.56e-3                                        | -                           | 1.19                        | -                          | 0.015                                                                | 790                            | -                          | -             | -            |    |
| H. Kawazoe          | MRS Bull.             | 2000        | PLD                     | CuGaO <sub>2</sub>                                  | -           | -                 | 6.30E-2                                        | 3.6                         | -                           | 1.7E18                     | 0.23                                                                 | 560                            | -                          | 500           | 80           |    |
| J. Tate             | Thin Solid Films      | 2002        | MS                      | CuGaO <sub>2</sub>                                  | -           | -                 | 2.00E-2                                        | 4.3                         | -                           | -                          | -                                                                    | 360                            | 0.1                        | 150           | 70-85        |    |
|                     |                       |             |                         | CuGaO <sub>2</sub>                                  | Fe          | 0.5               | 1.00E0                                         | 3.4                         | -                           | -                          | -                                                                    | 500                            | 0.1                        | 150           | 50-70        |    |
| M. Han              | J. Mater. Chem.       | 2012        | SG                      | CuGaO <sub>2</sub>                                  | -           | -                 | 1.70E-2                                        | 3.56                        | 3.24                        | 2.93E16                    | 3.37                                                                 | -                              | 0.21                       | -             | -            |    |
|                     |                       |             |                         | CuGaO <sub>2</sub>                                  | Cr          | 0.1               | 3.30E-2                                        | -                           | -                           | 9.56E16                    | 2.15                                                                 | -                              | -                          | -             | -            | -  |
|                     |                       |             |                         | CuGaO <sub>2</sub>                                  | Cr          | 0.2               | 7.10E-2                                        | 3.34                        | 2.88                        | 2.25E17                    | 1.92                                                                 | -                              | 0.175                      | -             | -            | 60 |

| First Author<br>Journal<br>Year<br>Synthesis Method | Material           | Dop. | Dop. level | $\sigma$ (S cm <sup>-1</sup> ) | E <sub>G D</sub> (eV) | E <sub>G I</sub> (eV) | n (cm <sup>-3</sup> ) | $\mu$ (cm <sup>2</sup> V <sup>-1</sup> s <sup>-1</sup> ) | S ( $\mu$ V/K) | E <sub>act</sub> (V) | t (nm) | T (%) |
|-----------------------------------------------------|--------------------|------|------------|--------------------------------|-----------------------|-----------------------|-----------------------|----------------------------------------------------------|----------------|----------------------|--------|-------|
| M. Han<br>J. Mater. Chem.<br>2012<br>SG             | CuGaO <sub>2</sub> | Cr   | 0.4        | 1.30E-2                        | 3.28                  | 2.83                  | 2.84E16               | 2.79                                                     | -              | 0.222                | -      | -     |
|                                                     | CuGaO <sub>2</sub> | Cr   | 0.6        | 2.40E-3                        | 3.18                  | 2.78                  | 7.29E15               | 2.18                                                     | -              | 0.252                | -      | -     |
|                                                     | CuGaO <sub>2</sub> | Cr   | 0.8        | 1.70E-3                        | 3.13                  | 2.72                  | 2.19E15               | 5.05                                                     | -              | 0.284                | -      | -     |
| N. Ashmore<br>J. Mater. Sci.<br>2005<br>SS          | CuGaO <sub>2</sub> | -    | -          | 5.70E-3                        | -                     | -                     | -                     | -                                                        | -              | 0.21                 | -      | -     |
|                                                     | CuGaO <sub>2</sub> | -    | -          | 6.90E-3                        | -                     | -                     | -                     | -                                                        | -              | 0.22                 | -      | -     |
|                                                     | CuGaO <sub>2</sub> | -    | -          | 7.10E-3                        | -                     | -                     | -                     | -                                                        | -              | 0.21                 | -      | -     |
|                                                     | CuGaO <sub>2</sub> | -    | -          | 1.10E-2                        | -                     | -                     | -                     | -                                                        | -              | 0.21                 | -      | -     |
| N. Ashmore<br>J. Mater. Sci.<br>2005<br>SS          | CuGaO <sub>2</sub> | -    | -          | 1.40E-2                        | -                     | -                     | -                     | -                                                        | -              | 0.2                  | -      | -     |
|                                                     | CuGaO <sub>2</sub> | -    | -          | 1.40E-2                        | -                     | -                     | -                     | -                                                        | -              | 0.18                 | -      | -     |

| First Author<br>Journal<br>Year<br>Synthesis Method      | Material           | Dop. | Dop. level | $\sigma$ (S cm <sup>-1</sup> ) | E <sub>G</sub> D (eV) | E <sub>G</sub> I (eV) | n (cm <sup>-3</sup> ) | $\mu$ (cm <sup>2</sup> V <sup>-1</sup> s <sup>-1</sup> ) | S ( $\mu$ V/K) | E <sub>act</sub> (V) | t (nm) | T (%) |
|----------------------------------------------------------|--------------------|------|------------|--------------------------------|-----------------------|-----------------------|-----------------------|----------------------------------------------------------|----------------|----------------------|--------|-------|
| N. Ashmore<br>J. Mater. Sci.<br>2005<br>SS               | CuGaO <sub>2</sub> | -    | -          | 1.60E-2                        | -                     | -                     | -                     | -                                                        | -              | 0.2                  | -      | -     |
|                                                          | CuGaO <sub>2</sub> | -    | -          | 1.60E-2                        | -                     | -                     | -                     | -                                                        | -              | 0.21                 | -      | -     |
| B. Yang<br>Mater. Res.<br>Soc. Symp. Proc.<br>2005<br>MS | CuInO <sub>2</sub> | -    | -          | 5.60E-2                        | 3.7                   | -                     | 1.6E19                | 0.2                                                      | -              | -                    | -      | 70    |
| B. G. Nair<br>Mater. Sci. Eng., B<br>2020<br>OPERE       | CuInO <sub>2</sub> | Al   | 0.02       | 2.25E0                         | 3.29                  | -                     | 1.28E19               | 1.09                                                     | -193.9         | -                    | -      | -     |
|                                                          | CuInO <sub>2</sub> | Al   | 0.07       | 3.68E0                         | 3.05                  | -                     | 1.12E18               | 20.4                                                     | 5.7            | -                    | -      | -     |
|                                                          | CuInO <sub>2</sub> | Al   | 0.12       | 3.45E0                         | 3.01                  | -                     | 5.84E17               | 37.28                                                    | 53.4           | -                    | -      | -     |
| C. W. Teplin<br>Appl. Phys. Lett.<br>2004<br>PLD         | CuInO <sub>2</sub> | Ca   | 0.05       | 3.00E-3                        | 4.15                  | -                     | -                     | -                                                        | 472            | -                    | 1000   | -     |
| H. Yanagi<br>Appl. Phys. Lett.<br>2001<br>PLD            | CuInO <sub>2</sub> | Ca   | 0.07       | 2.80E-3                        | 3.9                   | -                     | -                     | -                                                        | 480            | 0.19                 | 170    | 70    |
|                                                          | CuInO <sub>2</sub> | Sn   | 0.05       | 3.80E-3                        | 3.9                   | -                     | -                     | -                                                        | -50            | 0.077                | 280    | 70    |

| First Author<br>Journal<br>Year<br>Synthesis<br>Method                                                                               | Material                                                | Dop. | Dop. level | $\sigma$ (S cm <sup>-1</sup> ) | $E_G$ D (eV) | $E_G$ I (eV) | n (cm <sup>-3</sup> ) | $\mu$ (cm <sup>2</sup> V <sup>-1</sup> s <sup>-1</sup> ) | S ( $\mu$ V/K) | $E_{act}$ (V) | t (nm)  | T (%) |
|--------------------------------------------------------------------------------------------------------------------------------------|---------------------------------------------------------|------|------------|--------------------------------|--------------|--------------|-----------------------|----------------------------------------------------------|----------------|---------------|---------|-------|
| K. Isawa<br>Phys. Rev. B:<br>Condens. Matter<br>1997<br>SS                                                                           | CuLaO <sub>2</sub>                                      | -    | -          | 1.35E-1                        | -            | -            | -                     | -                                                        | -              | -             | -       | -     |
| G. Dong<br>J. Phys. Chem.<br>Solids<br>2012<br>SS                                                                                    | CuNdO <sub>2</sub>                                      | -    | -          | 2.70E-2                        | 3.14         | -            | 1.38E17               | 1.24                                                     | -              | -             | -       | -     |
| K. Isawa<br>Phys. Rev. B:<br>Condens. Matter<br>1997<br>SS                                                                           | CuNdO <sub>2</sub>                                      | -    | -          | 1.35E0                         | -            | -            | -                     | -                                                        | -              | -             | -       | -     |
| J. Tate<br>Thin Solid Films<br>2002<br>MS                                                                                            | CuNi <sub>2/3</sub><br>Sb <sub>1/3</sub> O <sub>2</sub> | Sn   | 0.1        | 5.00E-2                        | 3.4          | -            | -                     | -                                                        | 250            | 0.7           | 150-200 | 60    |
| K. Isawa<br>Phys. Rev. B:<br>Condens. Matter<br>1997<br>SS                                                                           | CuPrO <sub>2</sub>                                      | -    | -          | 3.68E-1                        | -            | -            | -                     | -                                                        | -              | -             | -       | -     |
| H. Kuriyama<br>The 25th<br>Proceedings of<br>the International<br>Conference on<br>Thermoelectrics,<br>Vienna, Austria<br>2006<br>SS | CuRhO <sub>2</sub>                                      | Mg   | 0.1        | 1.67E+2                        | -            | -            | -                     | -                                                        | 270            | -             | -       | -     |
| B. J. Ingram<br>Chem. Mater.<br>2004<br>SS                                                                                           | CuScO <sub>2</sub>                                      | -    | -          | 3.70E-1                        | -            | -            | 4.5E19                | 0.05                                                     | -              | 0.22          | -       | -     |
|                                                                                                                                      | CuScO <sub>2</sub>                                      | Mg   | 0.05       | 2.28E0                         | -            | -            | 4.48E20               | 0.03                                                     | -              | 0.25          | -       | -     |

| First Author<br>Journal<br>Year<br>Synthesis Method        | Material           | Dop. | Dop. level | $\sigma$ (S cm <sup>-1</sup> ) | E <sub>G D</sub> (eV) | E <sub>G I</sub> (eV) | n (cm <sup>-3</sup> ) | $\mu$ (cm <sup>2</sup> V <sup>-1</sup> s <sup>-1</sup> ) | S ( $\mu$ V/K) | E <sub>act</sub> (V) | t (nm) | T (%) |
|------------------------------------------------------------|--------------------|------|------------|--------------------------------|-----------------------|-----------------------|-----------------------|----------------------------------------------------------|----------------|----------------------|--------|-------|
| J. Tate<br>Thin Solid Films<br>2002<br>MS                  | CuScO <sub>2</sub> | Mg   | 0.05       | 2.00E1                         | 3.3-3.6               | -                     | -                     | -                                                        | -              | -                    | 250    | 15    |
| R. Nagarajan<br>Int. J.<br>Inorg. Mater.<br>2001<br>MS     | CuScO <sub>2</sub> | -    | -          | 3.00E1                         | 3.3                   | -                     | -                     | -                                                        | -              | -                    | 110    | 40    |
| Y. Kakehi<br>J. Appl. Phys.<br>2005<br>PLD                 | CuScO <sub>2</sub> | -    | -          | 1.08E-7                        | 3.7                   | -                     | -                     | -                                                        | -              | -                    | 135    | 75    |
|                                                            | CuScO <sub>2</sub> | Mg   | 0.1        | 2.50E-1                        | 3.7                   | -                     | -                     | -                                                        | 10             | 0.27                 | 124    | 65    |
| Y. Kakehi<br>Thin Solid films<br>2003<br>PLD               | CuScO <sub>2</sub> | -    | -          | 1.20E-4                        | 3.7                   | -                     | -                     | -                                                        | -              | -                    | -      | 70    |
| Y. Kakehi<br>J. Cryst. Growth<br>2009<br>PLD               | CuScO <sub>2</sub> | -    | -          | 1.00E-3                        | 3.7                   | -                     | 4.5E16                | 0.14                                                     | 968            | 0.62                 | 250    | 60    |
| K. Isawa<br>Phys. Rev. B:<br>Condens. Matter<br>1997<br>SS | CuSmO <sub>2</sub> | -    | -          | 4.97E-1                        | -                     | -                     | -                     | -                                                        | -              | -                    | -      | -     |
| B. J. Ingram<br>Chem. Mater.<br>2004<br>SS                 | CuYO <sub>2</sub>  | -    | -          | 1.80E-2                        | -                     | -                     | 2.6E18                | 0.04                                                     | -              | 0.23                 | -      | -     |
|                                                            | CuYO <sub>2</sub>  | Ca   | 0.05       | 2.60E-1                        | -                     | -                     | 3.3E19                | 0.05                                                     | -              | 0.28                 | -      | -     |







## Table S II

Compilation of Cu-Cr-O delafossite properties reported in literature (organized after methods and reports). The methods are separated using by thicker border lines, the references are separated by thinner border lines. Some reports contain sets of data, depending on the deposition conditions or various post-treatments

On the columns are depicted the followings:

**Methods:** The used abbreviations: ALD - Atomic Layer Deposition; CSD – Chemical Solution Deposition; **Dopant:** The chemical symbol of the dopant. For the Nitrogen (N,) the processes are described as in the presence of Nitrogen (as no detection of N in the films thereafter). For deposition methods using target the method used for target synthesis is underlined (SG- Solid Gel, SS - Solid State). **Level of the dopant.** The minus sign corresponds to a mentioned deficit. The gaseous percentages) are referring mostly to the deposition process (as “reactive” gases). ND – non doped phase. Generally, the articles mentioned first measure for non-doped material and then the measures for altered phases. Within a report, the non-doped data are separated by a double thin border line. **Electrical conductivity;** Room temperature data are presented; **Activation energy:** Mixed values for mobility and conduction activation are presented. **Carrier Concentration; Electric Mobility:** The H subscript refers to values measures by Hall effect. The underlined values indicate values calculated by us using  $\sigma = ne\mu$  (if conductivity and concentrations are presented); **Optical transmission; Seebeck coefficient; Direct or/and Indirect Band Gap; Thickness; The reference within the article**

| Method  | Dopant | Level of doping | Cond (RT) (S/m <sup>-1</sup> ) | Activ Energy (eV) | Concentration cm <sup>-3</sup> | mobility cm <sup>2</sup> V <sup>-1</sup> s <sup>-1</sup> | Seebeck coef. $\mu$ V K <sup>-1</sup> | T (%) | Band gap (eV) |                      | Thick (nm) | REF |
|---------|--------|-----------------|--------------------------------|-------------------|--------------------------------|----------------------------------------------------------|---------------------------------------|-------|---------------|----------------------|------------|-----|
|         |        |                 |                                |                   |                                |                                                          |                                       |       | Direct        | Indirec <sub>t</sub> |            |     |
| SOL GEL | ND     | -               | 0.0009                         | 0.292             | 1.421E+15                      | 3.89 <sup>H</sup>                                        |                                       |       | 3.14          | 2.79                 |            |     |
|         |        | 0.02            | 0.0237                         | 0.187             | 1.36E+17                       | 1.09 <sup>H</sup>                                        |                                       |       | 3.11          | 2.77                 |            |     |
|         |        | 0.04            | 0.832                          | 0.087             | 2.11E+19                       | 0.25 <sup>H</sup>                                        |                                       |       | 3.1           | 2.75                 |            |     |
|         |        | 0.06            | 2.03                           | 0.07              | 3.29E+19                       | 0.39 <sup>H</sup>                                        | 70-75                                 |       | 3             | 2.56                 | 320        | 181 |
|         |        | 0.08            | 2.21                           | 0.055             | 4.07E+20                       | 0.03 <sup>H</sup>                                        |                                       |       | 3.02          | 2.58                 |            |     |
|         |        | 0.1             | 2.94                           | 0.047             | 8.73E+20                       | 0.02 <sup>H</sup>                                        |                                       |       | 3.04          | 2.64                 |            |     |
|         |        | 0.12            | 3.85                           | 0.042             | 8.66E+20                       | 0.03 <sup>H</sup>                                        |                                       |       | 3.06          | 2.66                 |            |     |
|         |        | -               | 0.038                          |                   | 1.70E+17                       | 0.96                                                     |                                       |       | 3             |                      |            |     |
|         |        | ND              | -                              | 0.02              |                                | 1.30E+17                                                 | 1.4                                   | 60-75 |               |                      | 180        | 185 |
|         |        |                 | -                              | 0.023             |                                | 1.90E+17                                                 | 0.76                                  |       |               |                      |            |     |
|         |        |                 | -                              | 0.0048            |                                |                                                          |                                       |       |               |                      |            |     |
|         |        | ND              |                                |                   |                                |                                                          |                                       | <50   | 3.16          | 2.7                  |            |     |
|         |        |                 |                                |                   |                                |                                                          |                                       |       | 3.16          | 2.66                 | 88         | 186 |
|         |        |                 |                                |                   |                                |                                                          |                                       |       | 3.15          | 2.62                 |            |     |
|         |        | ND              | -                              | 0.017             |                                |                                                          |                                       | 202   | 40            |                      | 280        | 184 |
|         |        | ND              | -                              | 0.15              |                                | 1.70E+18                                                 | 0.56 <sup>H</sup>                     | 20    | 47            | 3                    | 190        |     |
|         |        | Zn              | 0.01                           | 0.26              |                                | 2.15E+18                                                 | 0.76 <sup>H</sup>                     | 40    | 50            | 3.05                 | 220        | 182 |
|         |        |                 | 0.03                           | 0.47              |                                | 3.20E+18                                                 | 0.92 <sup>H</sup>                     | 113   | 55            | 3.05                 | 205        |     |
|         |        | ND              | -                              | 0.0006            | 0.321                          | 2.90E+14                                                 | 14.3 <sup>H</sup>                     |       | 60-80         | 3.09                 | 2.72       | 251 |
|         |        | Ga              | 0.2                            | 0.0017            | 0.284                          | 2.19E+15                                                 | 5.05 <sup>H</sup>                     |       | 60-80         | 3.13                 | 2.78       | 254 |
|         | 0.4    |                 | 0.0024                         | 0.252             | 7.29E+15                       | 2.18 <sup>H</sup>                                        |                                       | 60-80 | 3.18          | 2.83                 | 242        |     |
|         | ND     |                 | 0.0011                         | 0.285             | 2.80E+14                       | 25                                                       |                                       | 45-55 | 2.95          |                      |            |     |
|         |        | 0.05            | 0.0032                         |                   | 3.80E+15                       | 5.3                                                      |                                       | 45-55 | 2.85          | 190                  |            |     |
|         | Cr def | 0.1             | 0.0044                         | 0.275             | 5.90E+15                       | 4.7                                                      |                                       | 60    | 3.05          |                      | 180        |     |
|         |        | 0.2             | 0.16                           | 0.18              | 1.80E+16                       | 56                                                       |                                       | 60    | 3.08          | 210                  |            |     |
|         | ND     |                 | 0.018                          | 0.301             | 3.14E+15                       | 6.75                                                     | 266                                   | 65-70 | 3.15          | 2.8                  | 103        |     |
|         |        | 0.03            | 0.027                          | 0.275             | 2.53E+16                       | 3.47                                                     | 202                                   | 60    | 3.12          | 2.77                 | 107        |     |
|         | Mg     | 0.05            | 0.14                           | 0.18              | 3.14E+18                       | 2.13                                                     | 180                                   | 60    | 3.11          | 2.76                 | 113        | 187 |
|         |        | 0.07            | 0.2                            | 0.306             | 6.23E+15                       | 6.12                                                     | 248                                   | 60    | 3.1           | 2.75                 | 115        |     |

|  |      |              |       |       |          |               |      |      |     |     |
|--|------|--------------|-------|-------|----------|---------------|------|------|-----|-----|
|  | ND   | 0            | 0.03  |       | 1.09E+15 | <u>172.02</u> | <50  | 3.09 |     |     |
|  |      | 0.025        | 0.05  |       | 8.80E+15 | <u>35.51</u>  | <50  | 3.09 |     |     |
|  | Zn   | 0.065        | 0.26  |       | 1.88E+17 | <u>8.64</u>   | <50  | 3.1  | 165 | 247 |
|  |      | 0.085        | 0.25  |       | 1.67E+17 | <u>9.36</u>   | <50  | 3.11 |     |     |
|  | ND   |              |       |       |          |               |      | 3.52 |     |     |
|  | Mg   | 0.05         | 0.022 | 0.055 | 2.20E+15 | 61.7          |      | 3.45 |     |     |
|  | S    | 0.1          |       |       |          |               |      | 3.5  |     | 242 |
|  | Mg+S | 0.05+<br>0.1 | 0.045 | 0.068 | 1.70E+16 | 16.3          |      | 3.48 |     |     |
|  | ND   |              | 0.001 | 0.28  |          |               |      | 1100 |     |     |
|  |      | 0.005        | 0.05  | 0.17  |          |               |      | 600  |     |     |
|  | Mg   | 0.01         | 0.1   | 0.17  |          |               |      | 390  |     | 144 |
|  |      | 0.02         | 1.25  | 0.19  |          |               |      | 260  |     |     |
|  | ND   |              | 0.004 | 0.278 |          |               |      | 350  |     |     |
|  |      | 0.005        | 0.67  | 0.119 |          | 0.034         |      |      |     |     |
|  |      | 0.01         | 1.21  | 0.095 |          | 0.031         |      |      |     |     |
|  | Mg   | 0.02         | 8.33  | 0.036 |          | 0.11          |      |      |     | 142 |
|  |      | 0.03         | 15.62 | 0.026 |          | 0.13          |      |      |     |     |
|  |      | 0.04         | 11    |       | 8.70E+20 | 0.085         | 50   |      |     |     |
|  | ND   |              | 0.001 | 0.29  |          |               |      |      |     |     |
|  |      | 0.02         | 0.01  | 0.24  |          |               |      |      |     |     |
|  | Ni   | 0.04         | 0.03  | 0.23  |          |               |      |      |     | 233 |
|  |      | 0.06         | 0.047 | 0.23  |          |               |      |      |     |     |
|  | ND   | 0.03         | 0.85  | 0.351 |          |               | 950  | 3.1  |     |     |
|  |      | 0.01         |       | 0.41  |          |               |      |      |     |     |
|  | Sn   | 0.03         |       | 0.407 |          |               |      |      |     | 246 |
|  | ND   |              |       |       | 1.00E+17 |               | 1600 |      |     |     |
|  | Mg   | 0.03         | 1     |       | 1.10E+19 |               | 200  |      |     |     |
|  | Ca   | 0.03         | 0.05  |       | 5.00E+18 |               | 800  |      |     | 237 |
|  | Sr   | 0.03         | 0.05  |       | 3.00E+18 |               | 750  |      |     |     |
|  | Ba   | 0.03         |       |       | 3.00E+17 |               | 900  |      |     |     |
|  | ND   |              |       |       |          |               | 3.35 | 1.28 |     | 177 |

SOLID STATE

PULSED LASER DEPOSITION

|                 |       |        |          |            |       |             |     |      |     |
|-----------------|-------|--------|----------|------------|-------|-------------|-----|------|-----|
| ND              |       |        |          |            |       |             |     |      |     |
| <u>SG</u>       | 0.25  | 0.52   |          |            | 60-80 | 3.2         |     | 90   | 189 |
| ND              |       |        |          |            |       |             |     |      |     |
| <u>SS</u>       | 4.76  | 0.169  | 3.13E+19 | 0.97       | 55    | 3.13        |     |      |     |
|                 | 0.05  | 0.017  | 0.191    | 1.60E+17   |       | 3.06        |     |      | 243 |
| Mn              | 0.1   | 0.008  | 0.256    | 6.59E+16   |       | 3.04        |     |      |     |
|                 | 0.15  | 0.08   | 0.195    | 1.26E+17   |       | 3.16        |     |      |     |
| ND              |       |        |          |            |       |             |     |      |     |
| <u>SS</u>       | 0.11  | 1.79   | 1.40E+18 | <u>7.7</u> | <60   | 3.17        |     | 26   |     |
|                 | 0.05  | 2.53   | 0.067    | 2.52E+18   |       | <u>6.27</u> | <50 | 3.12 | 36  |
| Fe              | 0.1   | 5.55   | 0.064    | 6.51E+18   |       | <u>5.32</u> | <50 | 3.08 | 38  |
|                 | 0.15  | 27.8   | 0.04     | 4.09E+19   |       | <u>4.2</u>  | <50 | 3.05 | 52  |
|                 |       | 0.015  |          |            |       |             | 55  | 3.2  | 57  |
| ND              |       |        |          |            |       |             | 60  | 3.2  | 127 |
| <u>SG</u>       |       | 0.33   |          |            |       |             | 60  | 3.2  | 134 |
|                 |       | 0.011  |          |            |       |             | 60  | 3.2  | 134 |
| ND              |       |        |          |            |       |             |     |      |     |
| <u>SG</u>       |       | 0.067  | 0.147    |            |       |             | 60  | 3.2  | 134 |
|                 | 0.02  | 0.4    | 0.032    |            |       |             | 60  | 3.2  | 127 |
| Mg              | 0.05  | 0.025  | 0.019    |            |       |             |     | 3.2  | 57  |
| ND              |       |        |          |            |       |             |     |      |     |
| <u>SS</u>       |       |        |          |            |       |             | 60  | 3.2  | 63  |
|                 | 0.05  |        |          |            |       |             | 65  | 3.1  | 27  |
| Mg              | 0.1   | 25     |          | 1.00E+22   | 0.042 |             |     | 3.2  | 135 |
| ND              |       |        |          |            |       |             |     |      |     |
| <u>SS</u>       |       | 8.3    |          |            |       |             | 65  | 3.2- | 50  |
|                 |       |        |          |            |       |             |     | 3.2  |     |
| Mg              | 0.02  | 16.35  |          |            |       |             |     |      |     |
| Mg+             | 0.02+ |        |          |            |       |             | 60  |      | 50  |
| V <sub>Cr</sub> | 0.03  | 29.63  |          |            |       |             |     |      |     |
| ND              |       |        |          |            |       |             |     |      |     |
| <u>SS</u>       |       | 0.0002 |          | 5.10E+14   |       |             |     | 3.25 |     |
|                 | 0.01  | 0.01   |          | 2.50E+15   |       |             |     | 3.24 |     |
| Ni              | 0.03  | 0.0125 |          | 1.90E+16   |       |             | <50 | 3.24 | 204 |
|                 | 0.05  | 0.1    |          | 2.30E+17   |       |             |     | 3.22 |     |

|  |           |       |       |       |          |       |     |       |      |     |     |
|--|-----------|-------|-------|-------|----------|-------|-----|-------|------|-----|-----|
|  | Mg        | 0.05  | 220   |       |          | 150   | 30  | 3.1   | 1.45 | 250 | 117 |
|  | <u>SS</u> |       |       |       |          |       |     |       |      |     |     |
|  | Mg        | 0.03  | 0.002 |       | 5.90E+17 | 2.53  | 804 |       |      |     |     |
|  | <u>SS</u> |       |       |       |          |       |     |       |      |     |     |
|  |           | 0.03  | 17.76 | 0.055 | 1.09E+21 | 0.074 | 140 |       |      |     |     |
|  |           | 0.03  | 64.27 | 0.055 | 1.42E+21 | 0.103 | 116 |       |      |     |     |
|  | Mg        | 0.03  | 52.82 | 0.063 | 1.34E+21 | 0.155 | 121 |       |      |     | 196 |
|  |           | 0.03  | 37.78 | 0.063 | 1.32E+21 | 0.182 | 122 | <50   | 3.3  | 300 |     |
|  |           | 0.03  | 52.16 |       | 1.18E+21 | 0.163 | 133 |       |      |     |     |
|  |           | 0.03  | 34.6  |       | 8.07E+20 | 0.408 | 167 |       |      |     |     |
|  | ND        |       | 0.38  |       | 1.19E+19 | 0.19  |     | 60-65 | 3.18 |     |     |
|  | ND        |       | 0.42  |       | 1.43E+19 | 0.18  |     | <50   | 3.17 | 100 | 203 |
|  | ND        |       |       |       |          |       |     |       |      |     |     |
|  | <u>SS</u> |       | 0.08  | 0.035 | 4.50E+18 | 0.11  |     |       | 3.05 |     |     |
|  | N gas     | 0.1   | 0.018 | 0.035 | 8.70E+18 | 0.14  |     | <40   | 3.07 | 300 | 210 |
|  | N gas     | 0.2   | 0.11  | 0.035 | 3.00E+19 | 0.25  |     |       | 3.13 |     |     |
|  | N gas     | 0.3   | 1.7   | 0.035 | 1.40E+20 | 0.81  |     |       | 3.19 |     |     |
|  |           |       | 0.057 |       | 1.00E+17 | 0.2   |     |       |      |     |     |
|  | Mg        | 0.05  | 0.17  |       | 2.50E+18 | 0.25  |     |       | 3.2  | 135 | 202 |
|  | <u>SS</u> |       | 0.4   |       | 6.00E+18 | 0.4   |     |       |      |     |     |
|  |           | Dual  | 0.19  |       | 4.00E+18 | 0.3   |     | 58    |      | 167 |     |
|  | ND        | Cu    | 0.17  |       | 3.80E+18 | 0.29  |     | 52    |      | 171 | 201 |
|  |           | Cr    | 0.09  |       | 3.40E+18 | 0.18  |     | 37    |      | 213 |     |
|  |           |       | 0.04  |       | 2.63E+18 | 0.09  |     | 18    |      | 315 |     |
|  | ND        | 0 0   | 0.01  |       | 3.40E+17 | 2.2   |     | 66    | 3.38 |     |     |
|  | <u>SS</u> |       |       |       |          |       |     |       |      |     |     |
|  | N         |       | 1.3   |       | 5.40E+19 | 0.173 |     | 69    | 3.42 |     |     |
|  | Mg        | 0.025 | 10.4  |       | 3.10E+20 | 0.018 |     | 66    | 3.25 |     |     |
|  | Mg+       | 0.025 | 278   |       | 1.20E+21 | 0.006 |     | 69    | 3.52 | 150 | 47  |
|  | N         | + N   |       |       |          |       |     |       |      |     |     |
|  | Mg        | 0.05  | 5.2   |       | 1.30E+20 | 0.011 |     | 64    | 3.2  |     |     |
|  | Mg+       | 0.05+ | 104   |       | 9.10E+20 | 0.023 |     | 67    | 3.6  |     |     |
|  | N         | N     |       |       |          |       |     |       |      |     |     |
|  | Mg        | 0.03  | 0.6   | 0.175 | 1.17E+20 |       | 329 |       | 2.73 | 300 | 257 |
|  | <u>SS</u> |       |       |       |          |       |     |       |      |     |     |
|  | Mg        | 0.05  | 0.28  |       | 1.00E+19 | 0.2   |     | 50    |      | 197 | 238 |
|  |           |       | 3.13  |       | 5.00E+19 | 0.7   |     | 70    | 3.1  | 195 |     |

CSD
